# Supplementary material for: A survey of early-career researchers in Australia
Source: eLife. 2021 Jan 11;10:e60613. doi: 10.7554/eLife.60613 (PMC7800379; doi:10.7554/eLife.60613)
Supplement: Figure 2—source data 1. [file elife-60613-fig2-data1.xlsx]

## Sheet: Sheet1
	Figure 2 - source data 1. Instances of words suggesting satisfaction or dissatisfaction in responses to Q76, Why do you stay
	Words suggesting satisfaction	Instances (word or derivatives)	Words suggesting dissatisfaction	Instances (word or derivatives)
	Love	108	Secure	25
	Like	54	Challenge	25
	Enjoy	52	Leave	23
	Interest	39	Impact	17
	Opportunity	35	Stress	12
	Good	33	Hard	12
	Difference	30	Difficulty	12
	Flexibility	29	Competition	12
	Passion	27	Problems	11
	Stay	23	Contract	10
	Reward	21	Pressure	10
	Total Satisfaction words	451	Total Dissatisfaction words	169
